# Supplementary material
Source: PubMed Central journal article supplement (PMC3037735)

**Supplemental Figure 1.** Genes of the hypoxia-inducible factor-1 alpha (HIF1 $\alpha$ ) system that are constitutively expressed through the periovulatory interval prior to rupture. The genes in this figure correspond to those highlighted in yellow in Figure 7.

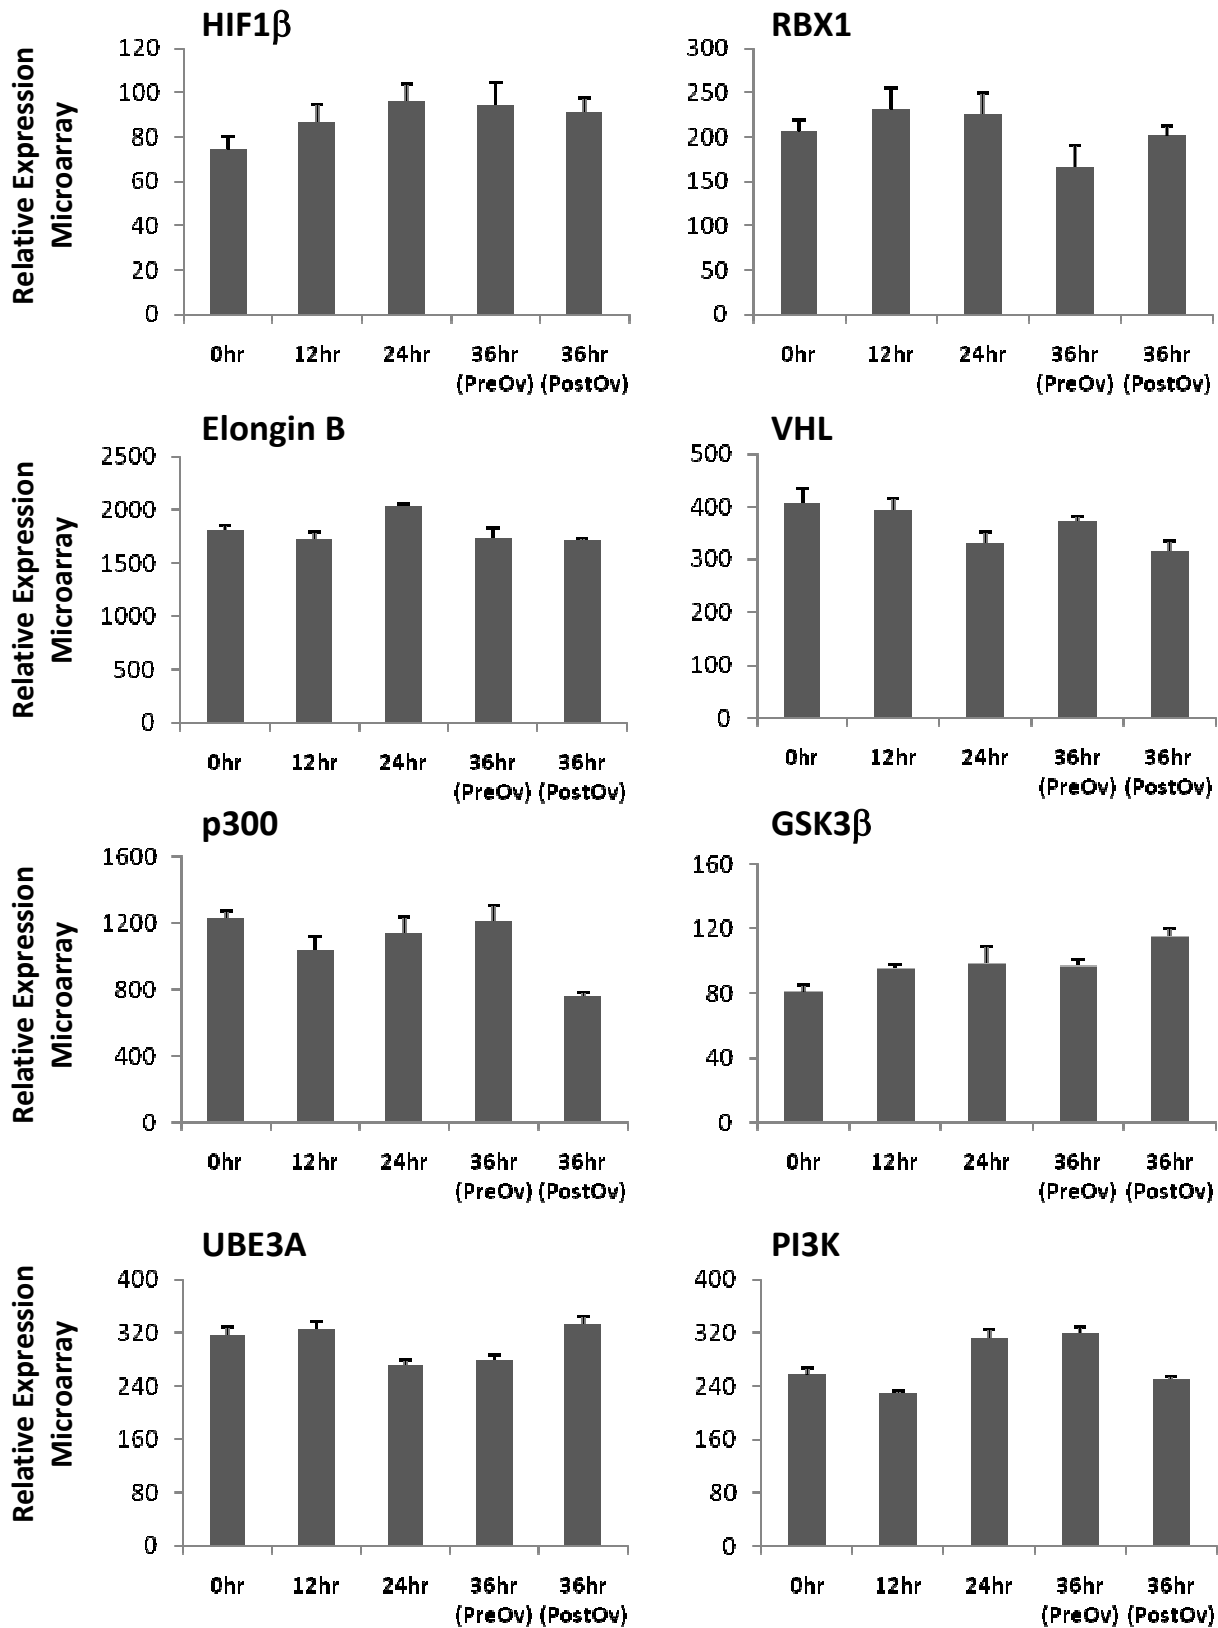

Supplement: supp_gaq089_gaq089supp.pdf [file supp_gaq089_gaq089supp.pdf]
